# Supplementary material for: Achieving very bright mechanoluminescence from purely organic luminophores with aggregation-induced emission by crystal design
Source: Chem Sci. 2016 Apr 26;7(8):5307–12. doi: 10.1039/c6sc01325b (PMC6020548; doi:10.1039/c6sc01325b)
Supplement: Supplementary file 1 [file SC-007-C6SC01325B-s001.pdf]

*Electronic Supplementary Information*

## **Achieving Very Bright Mechanoluminescence from Purely Organic Luminophores with Aggregation-Induced Emission by Crystal Design**

Bingjia Xu,<sup>a,b</sup> Wenlang Li,<sup>a</sup> Jiajun He,<sup>a</sup> Sikai Wu,<sup>a</sup> Qiangzhong Zhu,<sup>b</sup> Zhiyong Yang,<sup>\*a</sup> Yuan-Chun Wu,<sup>c</sup> Yi Zhang,<sup>\*a</sup> Chongjun Jin,<sup>b</sup> Po-Yen Lu,<sup>c</sup> Zhenguo Chi,<sup>\*a</sup> Siwei Liu,<sup>a</sup> Jiarui Xu<sup>a</sup> and Martin R. Bryce<sup>d</sup>

<sup>a</sup> PCFM Lab, GD HPPC Lab, Guangdong Engineering Technology Research Center for High-performance Organic and Polymer Photoelectric Functional Films, State Key Laboratory of Optoelectronic Material and Technologies, School of Chemistry and Chemical Engineering, Sun Yet-sen University, Guangzhou 510275, China.

E-mail: yangzhy29@mail.sysu.edu.cn; ceszy@mail.sysu.edu.cn; chizhg@mail.sysu.edu.cn; Tel: +86 20 84112712.

<sup>b</sup> State Key Laboratory of Optoelectronic Material and Technologies, School of Physics and Engineering, Sun Yat-sen University, Guangzhou 510275, China.

<sup>c</sup> Shenzhen China Star Optoelectronics Technology Co., Ltd, Guangdong, China.

<sup>d</sup> Department of Chemistry, Durham University, Durham DH1 3LE, UK.

### **1. General experimental procedures**

**Materials** (2-bromoethene-1,1,2-triyl)tribenzene, 9H-fluorene-9-one, benzophenone, tetrakis(triphenyl phosphine) palladium(0), Aliquat 336, (4-acetylphenyl)boronic acid, (4-formylphenyl)boronic acid and (3-formylphenyl)boronic acid purchased from Alfa Aesar were used as received. The compounds 4-(1,2,2-triphenylvinyl)benzaldehyde (*p*-P<sub>4</sub>A)<sup>1</sup> and 9-(dibromomethylene)-9H-fluorene (FBr<sub>2</sub>)<sup>2</sup>, and (2,2-dibromo ethene-1,1-diyl)dibenzene (P<sub>2</sub>Br<sub>2</sub>)<sup>2</sup> were synthesized according to the literature methods. Ultra-pure water was used in the experiments. All other reagents and solvents were purchased with analytical grade from Guangzhou Jincheng Company (China) and used without further purification. The water/tetrahydrofuran mixtures with different water fractions were prepared by slowly adding distilled water into the THF solution of the samples under ultrasound at room temperature.

**Characterization** Proton and carbon NMR (<sup>1</sup>HNMR and <sup>13</sup>CNMR) spectra were measured on a Mercury-Plus 300 spectrometer, a Bruker AVANCE 400 spectrometer or a Bruker AVANCE III spectrometer (CDCl<sub>3</sub>, tetramethylsilane as the internal standard). The mass spectra were measured using Thermo spectrometers (DSQ & MAT95XP-HRMS). The FT-IR spectra were obtained on a Nicolet NEXUS 670 spectrometer (KBr pellet). The elemental analysis was performed with a Vario EL analyzer. The UV-visible absorption spectra were determined on a Hitachi U-3900 spectrophotometer. The PL spectra were measured on an Ocean Optics Maya Pro2000 instrument with a 365 nm Ocean Optics LLS-LED as the excitation source. Light was introduced into the detector through an optical fiber. The ML spectra were collected from an Acton SP2750 spectrometer with a liquid-nitrogen-cooled CCD (SPEC-10, Princeton) as a power detector. ML images of *p*-P<sub>4</sub>A, *m*-P<sub>4</sub>A and *p*-P<sub>4</sub>A<sub>2</sub> were directly extracted from the supplementary movies (Videos S1, S2, S4 and S5) captured by a digital camera (Nikon D5100) with an AF-S Nikkor 35mm f/1.8G DX camera lens. This method is similar to the one employed in previous report.<sup>3</sup> Herein, the movies were transcribed by the camera in

an automatic mode with a capturing speed of 29 frames per second. The image of the capital letters “AITL” was captured by the Nikon D5100 digital camera in a manual mode. The corresponding parameters were set up as follows: aperture value f/2, exposure time 26 s, ISO 1600 and exposure compensation +0.3. The thermal behaviors were determined by DSC at heating and cooling rates of 10 °C/min under N<sub>2</sub> atmosphere using a NETZSCH thermal analyzer (DSC 204F1). Wide-angle XRD measurements were performed at 293 K using a Bruker X-ray diffractometer (D8 ADVANCE, Germany) with an X-ray source of Cu K $\alpha$  ( $\lambda$  = 0.15406 nm) at 40 kV and 40 mA at a scan rate of 4° (2 $\theta$ )/min. The fluorescence quantum yields of solid powders were measured in air on an integrating sphere (HAMAMATSU C11347) with a 330 nm UV light as the excitation source. The quantum chemistry calculations were performed at the B3LYP/6-31G (d, p) level of theory using the DFT method in the Gaussian 09 software.

The single crystals of all the target compounds were isolated from the mixtures of ethanol and CH<sub>2</sub>Cl<sub>2</sub> through the method of solvent evaporation. X-ray diffraction data for the single crystals were collected from a Bruker Smart 1000 CCD with Cu-K $\alpha$  radiation ( $\lambda$  = 1.54178 Å) at 150(10) K. All the structures were solved using direct methods following the difference Fourier syntheses. All non-hydrogen atoms were anisotropically refined through least-squares on  $F^2$  using the SHELXTL program suite. The anisotropic thermal parameters were assigned to all non-hydrogen atoms. The hydrogen atoms attached to carbon were placed in idealized positions and refined using a riding model to the atom from which they were attached. The pictures of the structures were produced using Diamond 3.2. CCDC 1468361, 1468362, 1468363, 1468364, and 1468365 contain the supplementary crystallographic data of *m*-P<sub>4</sub>A, *p*-FP<sub>2</sub>A, *p*-P<sub>4</sub>A, *p*-P<sub>4</sub>A<sub>2</sub>, *p*-P<sub>4</sub>Ac for this paper, respectively.

## References

- 1 X. Q. Zhang, Z. G. Chi, H. Y. Li, B. J. Xu, X. F. Li, W. Zhou, S. W. Liu, Y. Zhang and J. R. Xu., *Chem.-Asian J.* 2011, **6**, 808.
- 2 P. M. Donovan and L. T. Scott., *J. Am. Chem. Soc.*, 2003, **126**, 3108.
- 3 S. M. Jeong, S. Song, S. Lee, and N. Y. Ha., *Adv. Mater.*, 2013, **25**, 6194.

## 2. Synthesis

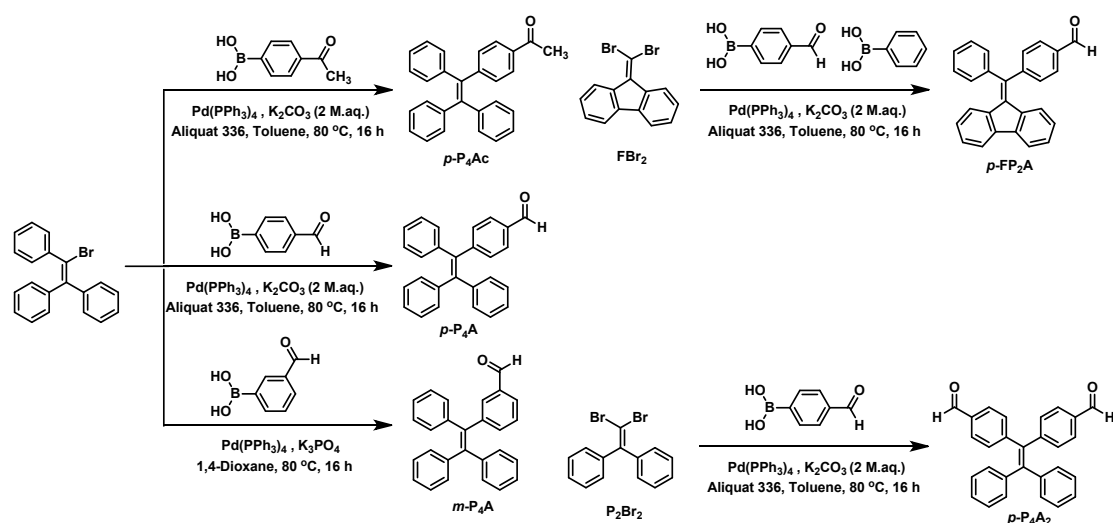

**Scheme 1.** Synthetic routes of the target compounds.

**Synthesis of 4-(1,2,2-triphenylvinyl)benzaldehyde (*p*-P<sub>4</sub>A)** <sup>[4]</sup> (2-bromoethene-1,1,2-triyl)tribenzene (1.00 g, 2.98 mmol) and (4-formylphenyl)boronic acid (0.49 g, 3.28 mmol) were dissolved in toluene (30 mL), and then 2 M aqueous K<sub>2</sub>CO<sub>3</sub> solution (4.5 mL) and Aliquat 336 (5 drops) were added. The mixture was stirred for 40 min under an argon atmosphere at room temperature. Then the Pd(PPh<sub>3</sub>)<sub>4</sub> catalyst was added, and the reaction mixture was stirred at 80 °C for 16 h. After cooling to room temperature, the product was concentrated and purified by silica gel column chromatography with dichloromethane/*n*-hexane (v/v=1:3). Compound *p*-P<sub>4</sub>A was obtained as a yellow crystalline solid in 97% yield (1.04 g). <sup>1</sup>H NMR (300 MHz, CDCl<sub>3</sub>) δ (ppm): 9.90-9.87 (s, 1 H); 7.64-7.57 (d, *J*=8.4 Hz, 2 H); 7.22-7.16 (d, *J*=8.1 Hz, 2 H); 7.15-7.05 (m, 9 H); 7.05-6.96 (m, 6 H). EI-MS, *m/z*: [M]<sup>+</sup> 360; calcd for C<sub>27</sub>H<sub>20</sub>O 360. HRMS, *m/z*: [M]<sup>+</sup> 360.1511; calcd for C<sub>27</sub>H<sub>20</sub>O 360.1514. Anal. Calc. for C<sub>27</sub>H<sub>20</sub>O: C 89.97%, H 5.59%; found: C 89.91%, H 5.63%.

**Synthesis of 1-(4-(1,2,2-triphenylvinyl)phenyl)ethanone (*p*-P<sub>4</sub>Ac)** (2-bromoethene-1,1,2-triyl) tribenzene (1.00g, 2.98 mmol) and (4-acetylphenyl)boronic acid (0.54 g, 3.28 mmol) were dissolved in toluene (30 mL), and then 2 M aqueous K<sub>2</sub>CO<sub>3</sub> solution (4.5 mL) and Aliquat 336 (5 drops) were added. The mixture was stirred for 40 min under an argon atmosphere at room temperature. Then the Pd(PPh<sub>3</sub>)<sub>4</sub> catalyst was added and the reaction mixture was stirred at 80 °C for 16 h. After cooling to room temperature, the product was concentrated and purified by silica gel column chromatography with dichloromethane/*n*-hexane (v/v=1:3). *p*-P<sub>4</sub>Ac was obtained as a white crystalline solid in 94% yield (1.05 g). <sup>1</sup>H NMR (300 MHz, CDCl<sub>3</sub>) δ (ppm): 7.72-7.64 (d, *J*=8.1 Hz, 2 H); 7.16-7.06 (m, 11 H); 7.05-6.95 (m, 6 H); 2.57-2.50 (s, 3 H). <sup>13</sup>C NMR (100 MHz, CDCl<sub>3</sub>) δ (ppm): 191.79, 146.66, 144.20, 143.55, 143.50, 141.69, 140.19, 137.29, 135.09, 132.00, 131.35, 131.31, 130.34, 130.18, 128.02, 127.81, 127.76, 127.66, 127.34, 126.64, 126.59, 126.55, 126.50. FT-IR (KBr) ν (cm<sup>-1</sup>): 3056, 3022, 1675, 1600, 1490, 1441, 1263, 763, 699. EI-MS, *m/z*: [M]<sup>+</sup> 374; calcd for C<sub>28</sub>H<sub>22</sub>O 374. HRMS, *m/z*: [M]<sup>+</sup> 374.1662; calcd for C<sub>28</sub>H<sub>22</sub>O 374.1671. Anal. Calc. for C<sub>28</sub>H<sub>22</sub>O: C 89.81%, H 5.92%; found: C 89.84%, H 5.96%.

**Synthesis of 4-((9H-fluoren-9-ylidene)(phenyl)methyl)benzaldehyde (*p*-FP<sub>2</sub>A)** FBr<sub>2</sub> (1.00g, 2.97mmol), benzenboronic acid (0.40g, 3.27mmol) and (4-formylphenyl)boronic acid (0.49g, 3.27mmol) were dissolved in toluene (30 mL), and then 2 M aqueous K<sub>2</sub>CO<sub>3</sub> solution (4 mL) and Aliquat 336 (5 drops) were added. The mixture was stirred for 40 min under an argon atmosphere at room temperature. Then the Pd(PPh<sub>3</sub>)<sub>4</sub> catalyst was added and the reaction mixture was stirred at 80 °C for 16 h. After cooling to room temperature, the product was concentrated and purified by silica gel column chromatography with dichloromethane/*n*-hexane (v/v=1:2). *p*-FP<sub>2</sub>A was obtained as a pale yellow crystalline solid in 46% yield (0.49 g). <sup>1</sup>H NMR (300 MHz, CDCl<sub>3</sub>) δ (ppm): 10.13-10.00 (s, 1 H); 7.98-7.88 (d, *J*=8.0 Hz, 2 H); 7.73-7.65 (d, *J*=7.5 Hz, 2 H); 7.61-7.54 (d, *J*=8.3 Hz, 2 H); 7.46-7.40 (m, 3 H); 7.39-7.34 (m, 2 H); 7.29-7.21 (t, 2 H); 6.96-6.89 (m, 2 H); 6.64-6.58 (d, *J*=8.0 Hz, 2 H). <sup>13</sup>C NMR (100 MHz, CDCl<sub>3</sub>) δ (ppm): 191.76, 149.22, 143.31, 142.12, 140.83, 140.67, 138.35, 138.08, 135.80, 135.31, 130.51, 130.18, 129.65, 129.06, 128.55, 128.18, 126.64, 126.56, 125.05, 124.84, 119.48, 119.36. FT-IR (KBr) ν (cm<sup>-1</sup>): 3052, 2841, 1700, 1598, 1437, 737, 698. EI-MS, *m/z*: [M]<sup>+</sup> 358; calcd for C<sub>27</sub>H<sub>18</sub>O 358. HRMS, *m/z*: [M]<sup>+</sup> 358.1354; calcd for C<sub>27</sub>H<sub>18</sub>O 358.1358. Anal. Calc. for C<sub>27</sub>H<sub>18</sub>O: C 90.47%, H 5.06%; found: C 90.42%, H 5.09%.

**Synthesis of 3-(1,2,2-triphenylvinyl)benzaldehyde (*m*-P<sub>4</sub>A)** (2-bromoethene-1,1,2-triyl)tribenzene (1.23 g, 3.67 mmol) and (3-formylphenyl)boronic acid (0.50 g, 3.33 mmol) were dissolved in 1,4-dioxane (30 mL), and then potassium phosphate (1.72g, 8.10 mmol) were added. The mixture was stirred for 40 min under an argon atmosphere at room temperature. Then the Pd(PPh<sub>3</sub>)<sub>4</sub> catalyst was added and the reaction mixture was stirred at

80 °C for 16 h. After cooling to room temperature, the product was concentrated and purified by silica gel column chromatography with dichloromethane/*n*-hexane (v/v=1:4). *m*-P<sub>4</sub>A was obtained as a white crystalline solid in 72% yield (0.70 g). <sup>1</sup>H NMR (300 MHz, CDCl<sub>3</sub>) δ (ppm): 9.81-9.76 (s, 1 H); 7.63-7.59 (dd, 1 H); 7.54-7.49 (s, 1 H); 7.33-7.21 (m, 2 H); 7.15-7.07 (m, 9 H); 7.06-6.99 (m, 6 H). <sup>13</sup>C NMR (100 MHz, CDCl<sub>3</sub>) δ (ppm): 192.20, 144.83, 143.10, 143.03, 142.86, 142.43, 139.45, 137.28, 136.12, 133.05, 131.26, 131.23, 131.15, 128.37, 127.90, 127.87, 127.72, 127.22, 126.82, 126.74. FT-IR (KBr) ν (cm<sup>-1</sup>): 3051, 2716, 2795, 1702, 1586, 1437, 755, 700. EI-MS, *m/z*: [M]<sup>+</sup> 360; calcd for C<sub>27</sub>H<sub>20</sub>O 360. HRMS, *m/z*: [M]<sup>+</sup> 360.1508; calcd for C<sub>27</sub>H<sub>20</sub>O 360.1514. Anal. Calc. for C<sub>27</sub>H<sub>20</sub>O: C 89.97%, H 5.59%; found: C 89.93%, H 5.61%.

**Synthesis of 4,4'-(2,2-diphenylethene-1,1-diyl)dibenzaldehyde (*p*-P<sub>4</sub>A<sub>2</sub>)** P<sub>2</sub>Br<sub>2</sub> (1.00g, 2.97mmol) and (4-formylphenyl)boronic acid (0.98 g, 6.51 mmol) were dissolved in toluene (30 mL), and then 2 M aqueous K<sub>2</sub>CO<sub>3</sub> solution (8 mL) and Aliquat 336 (5 drops) were added. The mixture was stirred for 40 min under an argon atmosphere at room temperature. Then the Pd(PPh<sub>3</sub>)<sub>4</sub> catalyst was added and the reaction mixture was stirred at 80 °C for 16 h. After cooling to room temperature, the product was concentrated and purified by silica gel column chromatography with dichloromethane/*n*-hexane (v/v=2:1). *p*-P<sub>4</sub>A<sub>2</sub> was obtained as a yellow crystalline solid in 83% yield (1.09 g). <sup>1</sup>H NMR (500 MHz, CDCl<sub>3</sub>) δ (ppm): 9.93-9.90 (s, 2 H); 7.66-7.63 (d, *J*=8.3 Hz, 4 H); 7.19-7.11 (m, 10 H); 7.04-6.99 (dd, *J*=7.9, 1.5 Hz, 4 H). <sup>13</sup>C NMR (125 MHz, CDCl<sub>3</sub>) δ (ppm): 191.75, 149.62, 145.08, 142.37, 138.52, 134.59, 131.39, 131.21, 129.37, 128.03, 127.53. FT-IR (KBr) ν (cm<sup>-1</sup>): 3058, 2800, 2744, 1694, 1597, 1564, 1208, 1166, 700. EI-MS, *m/z*: [M]<sup>+</sup> 388; calcd for C<sub>28</sub>H<sub>20</sub>O<sub>2</sub> 388. HRMS, *m/z*: [M]<sup>+</sup> 388.1454; calcd for C<sub>28</sub>H<sub>20</sub>O<sub>2</sub> 388.1463. Anal. Calc. for C<sub>28</sub>H<sub>20</sub>O<sub>2</sub>: C 86.57%, H 5.19%; found: C 86.52%, H 5.23%.

### 3. Figures and Tables

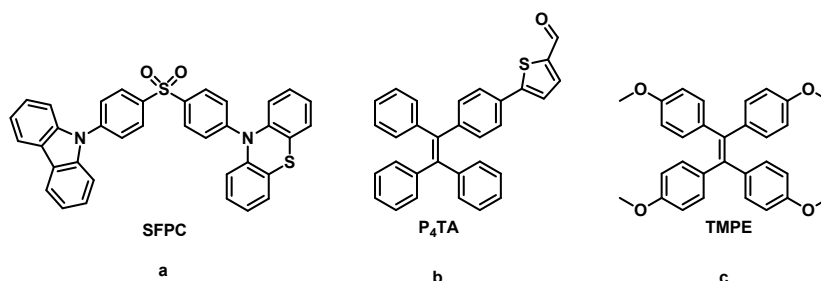

Fig. S1 Molecular structures of previously reported AIE-ML luminophores.

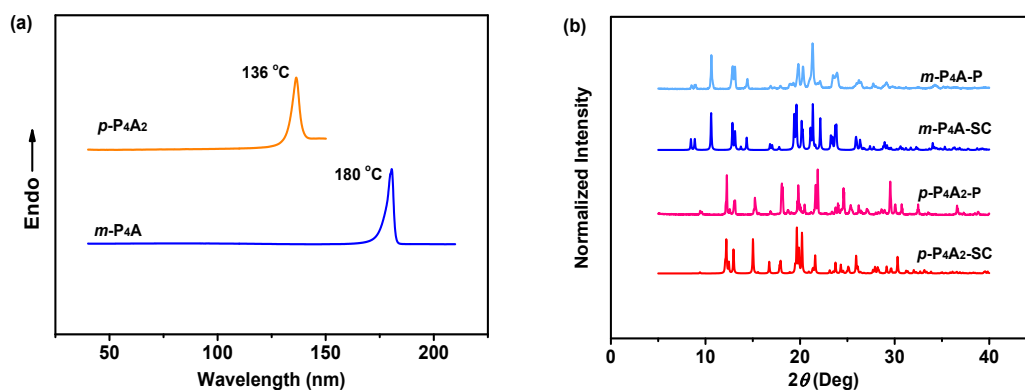

**Fig. S2** DSC curves (a) and XRD patterns (b) of  $m$ -P<sub>4</sub>A and  $p$ -P<sub>4</sub>A<sub>2</sub>.  $m$ -P<sub>4</sub>A-P, powder of  $m$ -P<sub>4</sub>A;  $m$ -P<sub>4</sub>A-SC, single crystal of  $m$ -P<sub>4</sub>A;  $p$ -P<sub>4</sub>A<sub>2</sub>-P, powder of  $p$ -P<sub>4</sub>A<sub>2</sub>;  $p$ -P<sub>4</sub>A<sub>2</sub>-SC, single crystal of  $p$ -P<sub>4</sub>A<sub>2</sub>.

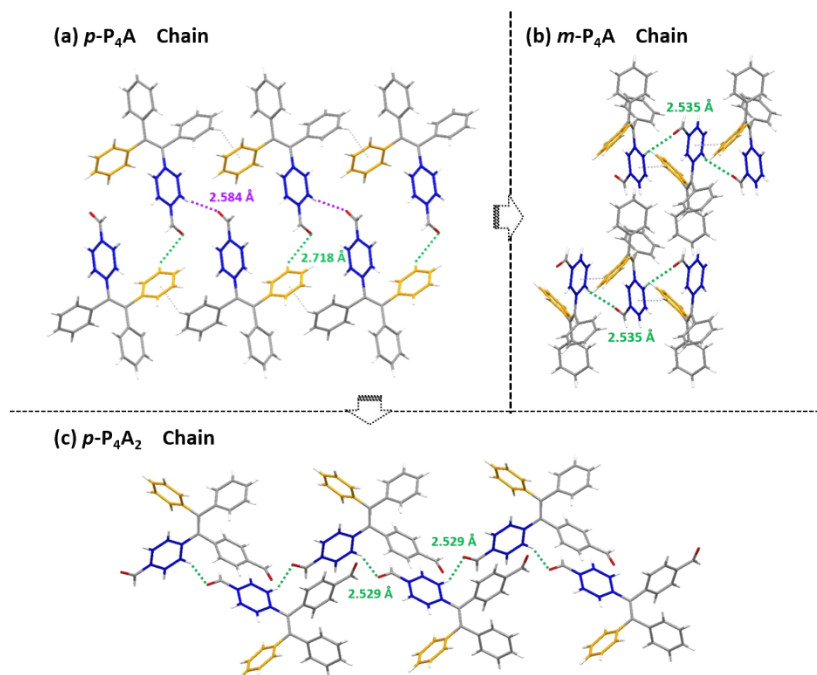

**Fig. S3** Molecular packing and intermolecular interactions of  $p$ -P<sub>4</sub>A (a),  $m$ -P<sub>4</sub>A (b) and  $p$ -P<sub>4</sub>A<sub>2</sub> (c) in their single crystal structures

|                                                                                                                                                                                                                                                                                                                      |                                                                                                                                                                                                                                                                                                                    |                                                                                                                                                                                                                                                                                                                      |                                                                                                                                                                                                                                                                                                                          |
|----------------------------------------------------------------------------------------------------------------------------------------------------------------------------------------------------------------------------------------------------------------------------------------------------------------------|--------------------------------------------------------------------------------------------------------------------------------------------------------------------------------------------------------------------------------------------------------------------------------------------------------------------|----------------------------------------------------------------------------------------------------------------------------------------------------------------------------------------------------------------------------------------------------------------------------------------------------------------------|--------------------------------------------------------------------------------------------------------------------------------------------------------------------------------------------------------------------------------------------------------------------------------------------------------------------------|
| 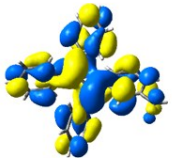<br><b>LUMO+1</b><br>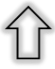<br><b>f=0.3357</b><br>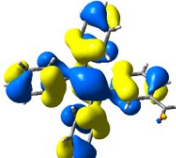<br><b>HOMO</b> | 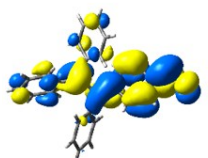<br><b>LUMO</b><br>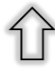<br><b>f=0.3722</b><br>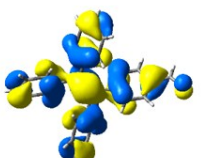<br><b>HOMO</b> | 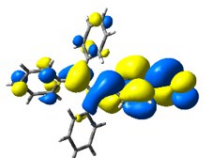<br><b>LUMO</b><br>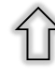<br><b>f=0.3270</b><br>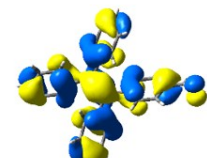<br><b>HOMO</b> | 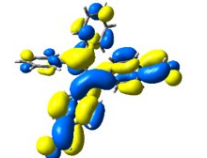<br><b>LUMO</b><br>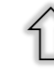<br><b>f=0.3146</b><br>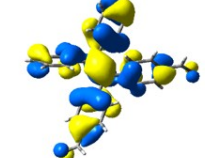<br><b>HOMO</b> |
| <b><math>m</math>-P<sub>4</sub>A</b>                                                                                                                                                                                                                                                                                 | <b><math>p</math>-P<sub>4</sub>A-B<sub>sc1</sub></b>                                                                                                                                                                                                                                                               | <b><math>p</math>-P<sub>4</sub>A-B<sub>sc2</sub></b>                                                                                                                                                                                                                                                                 | <b><math>p</math>-P<sub>4</sub>A<sub>2</sub></b>                                                                                                                                                                                                                                                                         |
| <b>3.83 Debye</b>                                                                                                                                                                                                                                                                                                    | <b>4.79 Debye</b>                                                                                                                                                                                                                                                                                                  | <b>5.42 Debye</b>                                                                                                                                                                                                                                                                                                    | <b>4.78 Debye</b>                                                                                                                                                                                                                                                                                                        |

**Fig. S4** The HOMO (lower images), LUMO (upper images), oscillator strengths (f) and dipolar moments of the molecules in their single crystal structures.  $p$ -P<sub>4</sub>A-B<sub>sc1</sub> and  $p$ -P<sub>4</sub>A-B<sub>sc2</sub> are the two conformations of  $p$ -P<sub>4</sub>A.

**Table S1.** Computed vertical transitions and their oscillator strengths.

| Conformation                                             | Oscillator Strength ( <i>f</i> ) | Transition    | Coefficients |
|----------------------------------------------------------|----------------------------------|---------------|--------------|
| <i>p</i> -P <sub>4</sub> A-B <sub>SC1</sub> <sup>a</sup> | 0.3722                           | HOMO→LUMO     | 0.70088      |
|                                                          | 0.0020                           | HOMO-2→LUMO   | 0.56951      |
|                                                          |                                  | HOMO-2→LUMO+1 | 0.16973      |
|                                                          |                                  | HOMO-1→LUMO   | -0.34159     |
|                                                          | 0.1340                           | HOMO-3→LUMO   | 0.14718      |
|                                                          |                                  | HOMO-1→LUMO   | -0.10956     |
|                                                          |                                  | HOMO→LUMO+1   | 0.66590      |
|                                                          | 0.0233                           | HOMO-3→LUMO   | 0.15269      |
|                                                          |                                  | HOMO-2→LUMO   | 0.32352      |
|                                                          |                                  | HOMO-1→LUMO   | 0.56620      |
|                                                          |                                  | HOMO→LUMO+1   | 0.10796      |
|                                                          |                                  | HOMO→LUMO+2   | 0.11371      |
| <i>p</i> -P <sub>4</sub> A-B <sub>SC2</sub> <sup>a</sup> | 0.0004                           | HOMO-1→LUMO   | 0.67912      |
|                                                          |                                  | HOMO-1→LUMO+1 | -0.14246     |
|                                                          | 0.3270                           | HOMO→LUMO     | 0.69801      |
|                                                          | 0.0939                           | HOMO-2→LUMO   | 0.49176      |
|                                                          |                                  | HOMO→LUMO+1   | 0.48536      |
|                                                          | 0.1160                           | HOMO-3→LUMO   | 0.36658      |
|                                                          |                                  | HOMO-2→LUMO   | 0.42717      |
|                                                          |                                  | HOMO→LUMO+1   | -0.39175     |
|                                                          |                                  | HOMO→LUMO     | 0.69946      |
|                                                          |                                  | HOMO-4→LUMO   | 0.67992      |
| <i>m</i> -P <sub>4</sub> A                               | 0.0152                           | HOMO-4→LUMO+1 | 0.10950      |
|                                                          |                                  | HOMO→LUMO+1   | 0.70038      |
|                                                          |                                  | HOMO-2→LUMO   | -0.11298     |
|                                                          | 0.0157                           | HOMO-1→LUMO   | 0.61379      |
|                                                          |                                  | HOMO-1→LUMO+1 | -0.14060     |
|                                                          |                                  | HOMO-1→LUMO+2 | -0.25398     |
|                                                          |                                  | HOMO→LUMO     | 0.68955      |
| <i>p</i> -P <sub>4</sub> A <sub>2</sub>                  | 0.3146                           | HOMO→LUMO+1   | -0.13006     |
|                                                          |                                  | HOMO→LUMO     | 0.12768      |
|                                                          | 0.2413                           | HOMO→LUMO+1   | 0.68562      |
|                                                          |                                  | HOMO-3→LUMO   | -0.12430     |
|                                                          | 0.0000                           | HOMO-2→LUMO   | 0.48977      |
|                                                          |                                  | HOMO-2→LUMO+1 | 0.34096      |
|                                                          |                                  | HOMO-2→LUMO+3 | 0.14894      |
|                                                          |                                  | HOMO-1→LUMO   | -0.21991     |
|                                                          |                                  | HOMO-1→LUMO+1 | -0.14811     |
|                                                          |                                  | HOMO-4→LUMO   | -0.37880     |
|                                                          |                                  | HOMO-4→LUMO+1 | 0.51392      |
|                                                          | 0.0020                           |               |              |
|                                                          |                                  |               |              |

|               |          |
|---------------|----------|
| HOMO-3→LUMO   | 0.12952  |
| HOMO-3→LUMO+1 | -0.17444 |

<sup>a</sup> *p*-P<sub>4</sub>A-B<sub>SC1</sub> and *p*-P<sub>4</sub>A-B<sub>SC2</sub> are the two conformations of *p*-P<sub>4</sub>A.

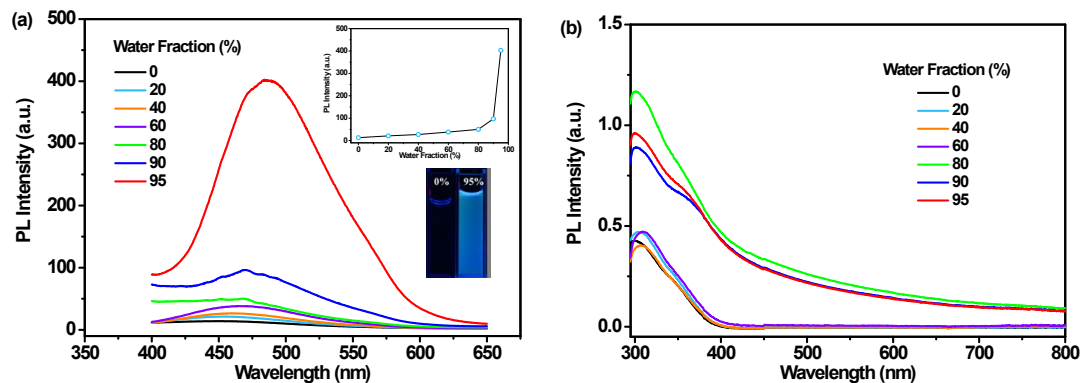

**Fig. S5** PL (a) and UV-visible (b) spectra of *p*-P<sub>4</sub>A<sub>2</sub> in the mixtures of THF/water with different water contents. The inset of (a) are the changes of peak intensities (upper) of the PL spectra and the fluorescence images (lower) of *p*-P<sub>4</sub>A<sub>2</sub> in pure THF and in the mixtures of THF/water with 95% water fraction. The PL spectra were recorded under the excitation of 365 nm UV light.

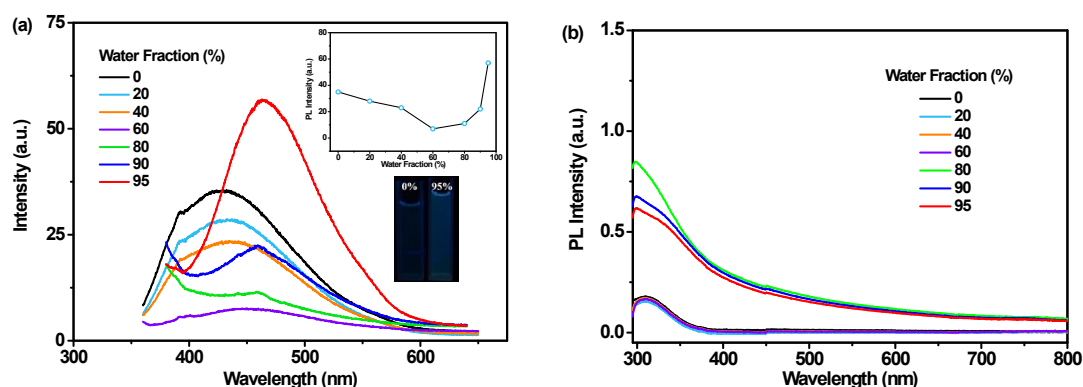

**Fig. S6** PL (a) and UV-visible (b) spectra of *m*-P<sub>4</sub>A in the mixtures of THF/water with different water contents. The inset of (a) are the changes of peak intensities (upper) of the PL spectra and the fluorescence images (lower) of *m*-P<sub>4</sub>A in pure THF and in the mixtures of THF/water with 95% water fraction. The PL spectra were recorded under the excitation of 365 nm UV light.

**Table S2** Effective diameter and polydispersity of the compounds in THF/water mixtures.<sup>a</sup>

| Compound                                | Effective Diameter (nm) | Polydispersity |
|-----------------------------------------|-------------------------|----------------|
| <i>p</i> -P <sub>4</sub> A              | 326.36                  | 0.161          |
| <i>p</i> -P <sub>4</sub> A <sub>2</sub> | 395.68                  | 0.176          |
| <i>m</i> -P <sub>4</sub> A              | 339.06                  | 0.179          |

<sup>a</sup> In THF/water mixtures with 95% water content.

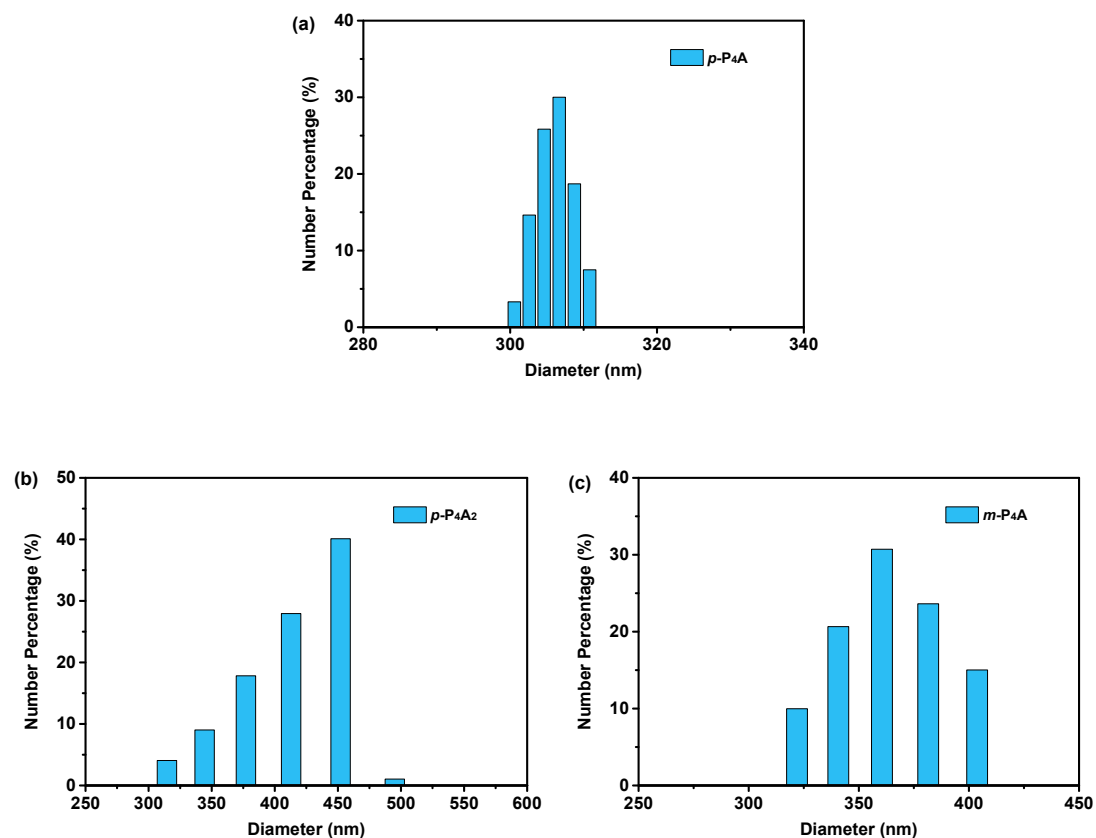

**Fig. S7** The particle diameter distributions of the compounds in THF/water mixtures with 95% water content.

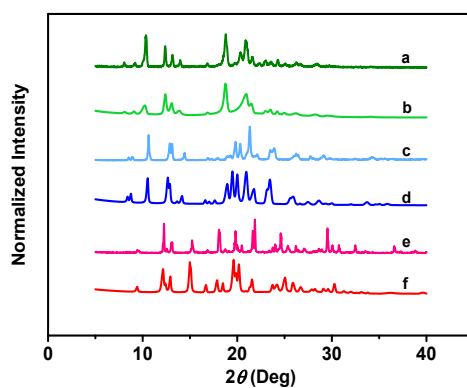

**Fig. S8** XRD patterns of the original and ground samples of the compounds. a, Original sample of *p*-P<sub>4</sub>A; b, ground sample of *p*-P<sub>4</sub>A; c, original sample of *m*-P<sub>4</sub>A; d, ground sample of *m*-P<sub>4</sub>A; e, original sample of *p*-P<sub>4</sub>A<sub>2</sub>; f, ground sample of *p*-P<sub>4</sub>A<sub>2</sub>.

#### 4. Structural Information

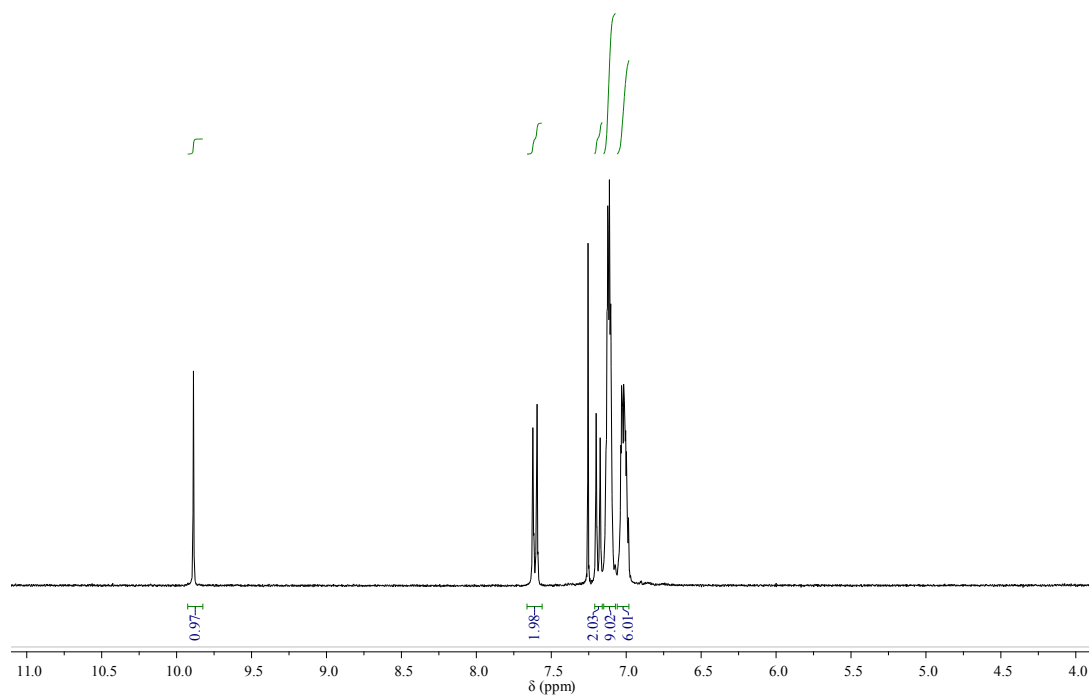

Fig. S9  $^1\text{H}$  NMR spectrum of  $p\text{-P}_4\text{A}$  in  $\text{CDCl}_3$

090403 #49 RT: 1.27 AV: 1 NL: 2.73E5  
T: + c Full ms [45.00-800.00]

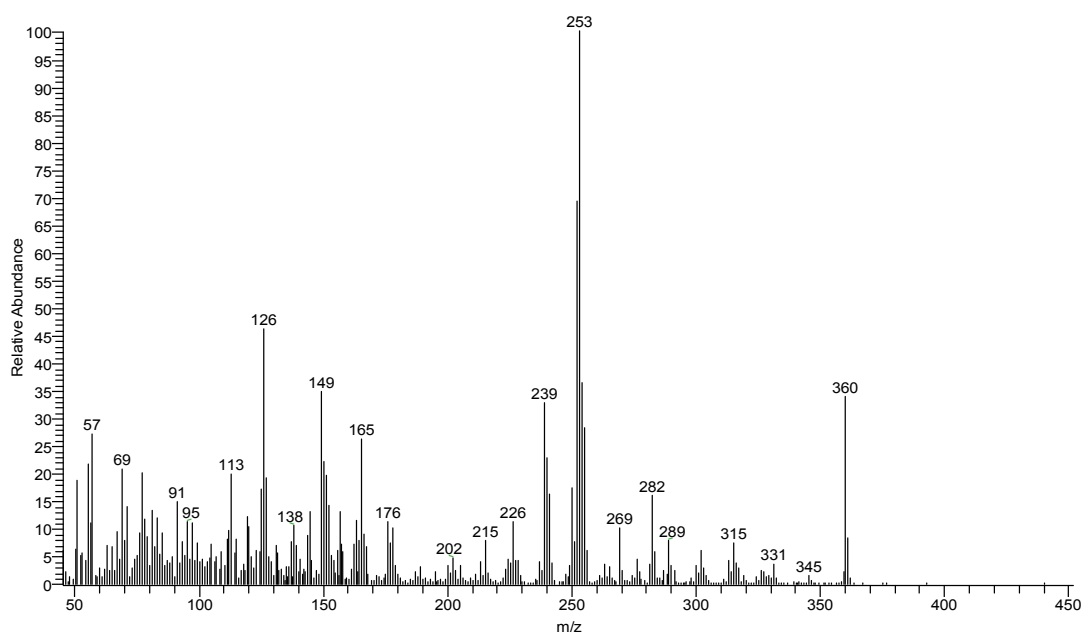

Fig. S10 EI-MS of  $p\text{-P}_4\text{A}$

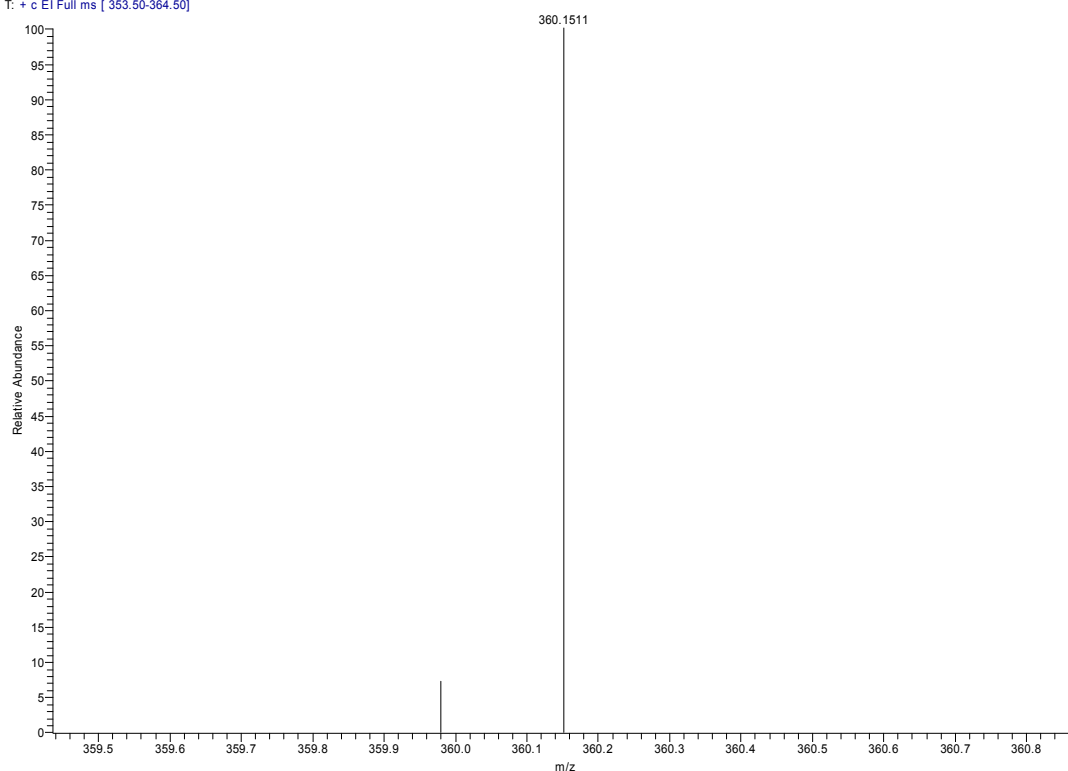

Fig. S11 HRMS of *p*-P<sub>4</sub>A

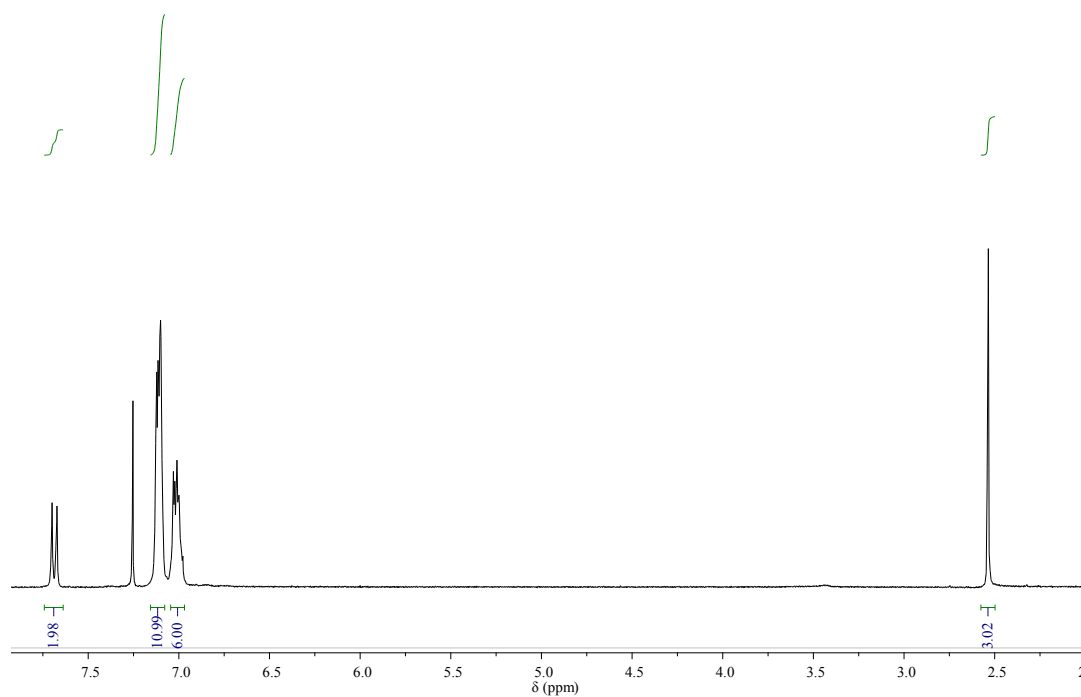

Fig. S12 <sup>1</sup>H NMR spectrum of *p*-P<sub>4</sub>Ac in CDCl<sub>3</sub>

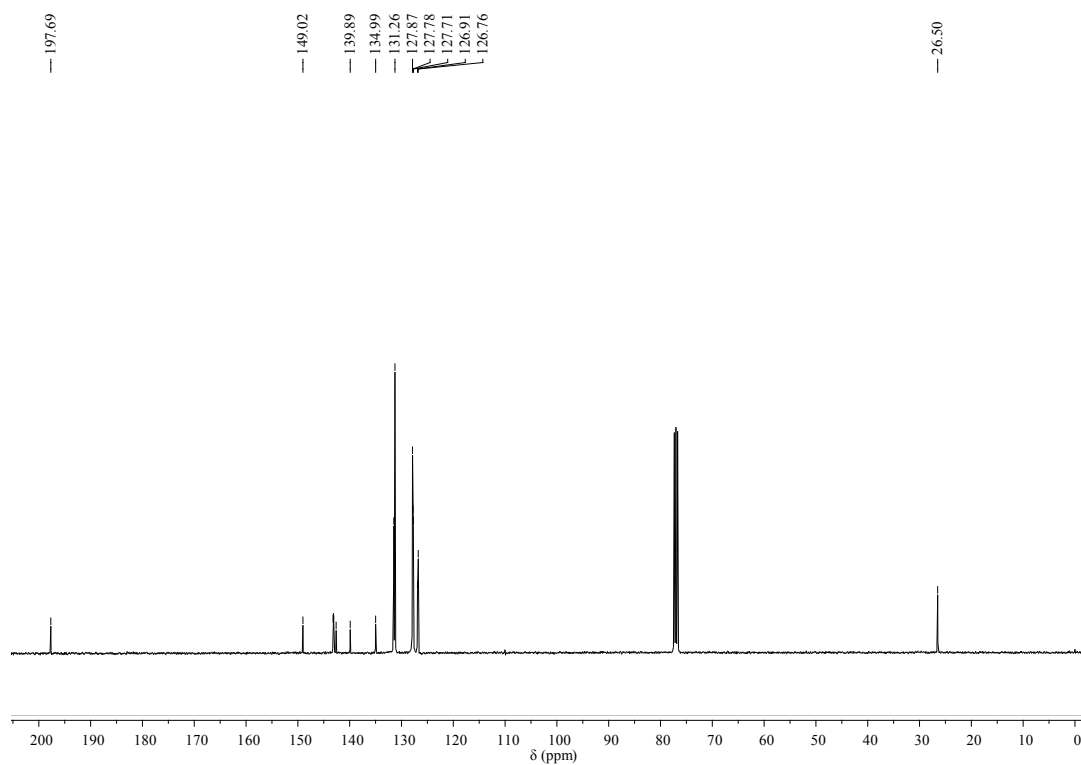

Fig. S13  $^{13}\text{C}$  NMR spectrum of  $p\text{-P}_4\text{Ac}$  in  $\text{CDCl}_3$

Instrument:DSQ(Thermo)  
 Ionization Method:EI  
 D:\DSQDATA-LR\14\090404

9/4/2014 3:52:34 PM

P4Ac

090404 #46 RT: 1.19 AV: 1 NL: 7.12E5  
 T: + c Full ms [45.00-800.00]

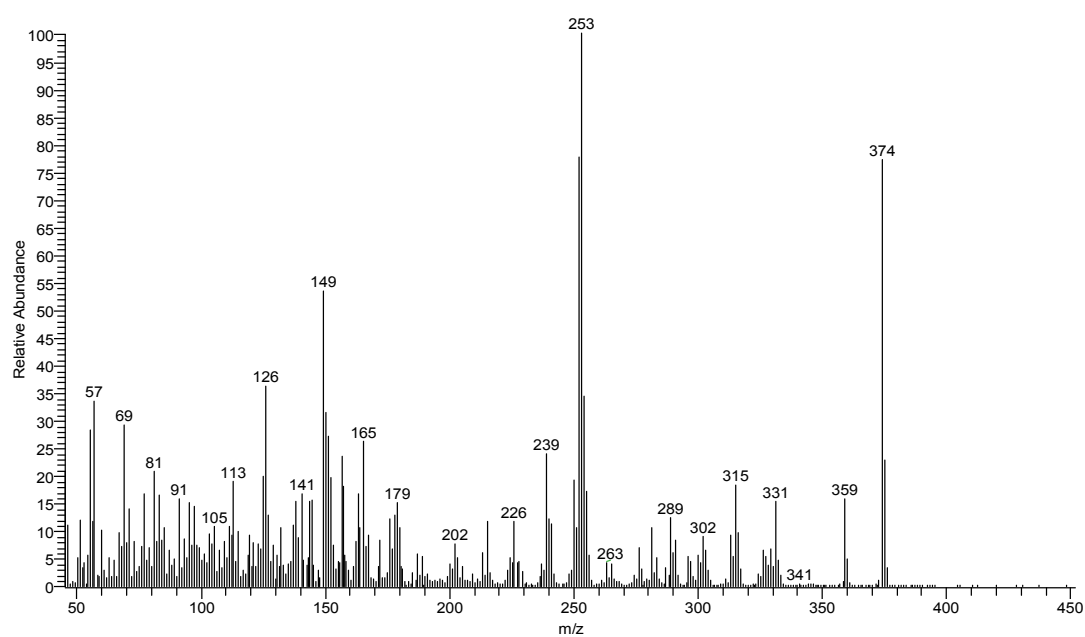

Fig. S14 EI-MS of  $p\text{-P}_4\text{Ac}$

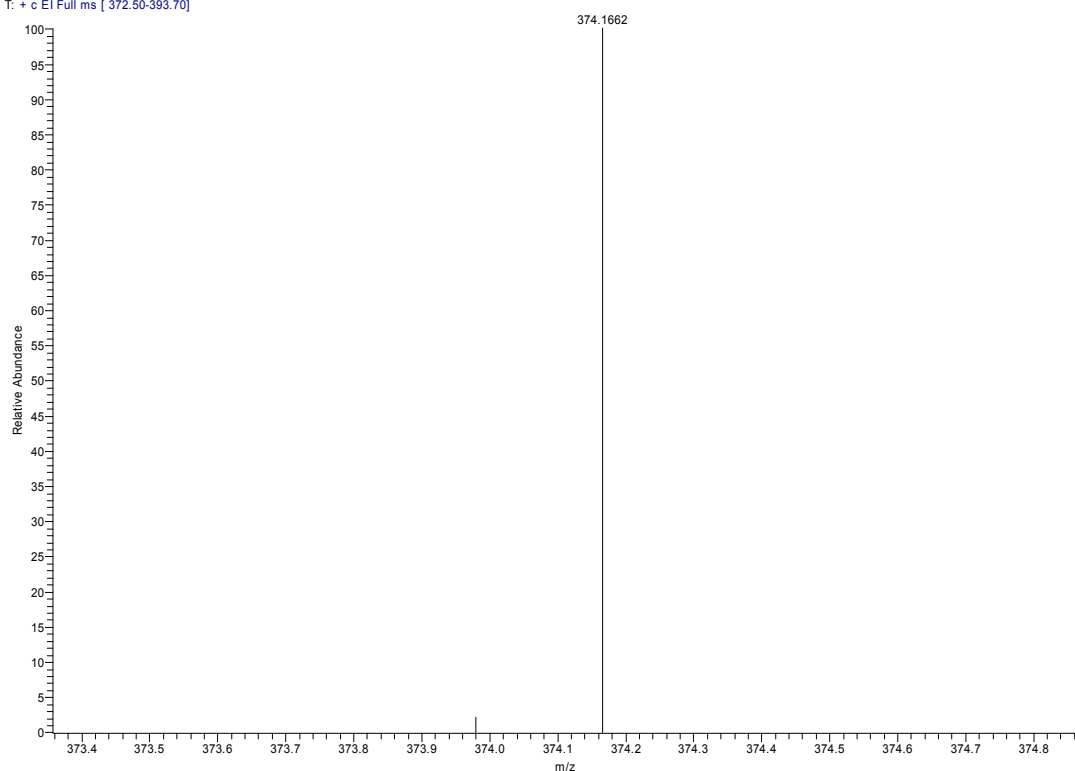

Fig. S15 HRMS of *p*-P<sub>4</sub>Ac

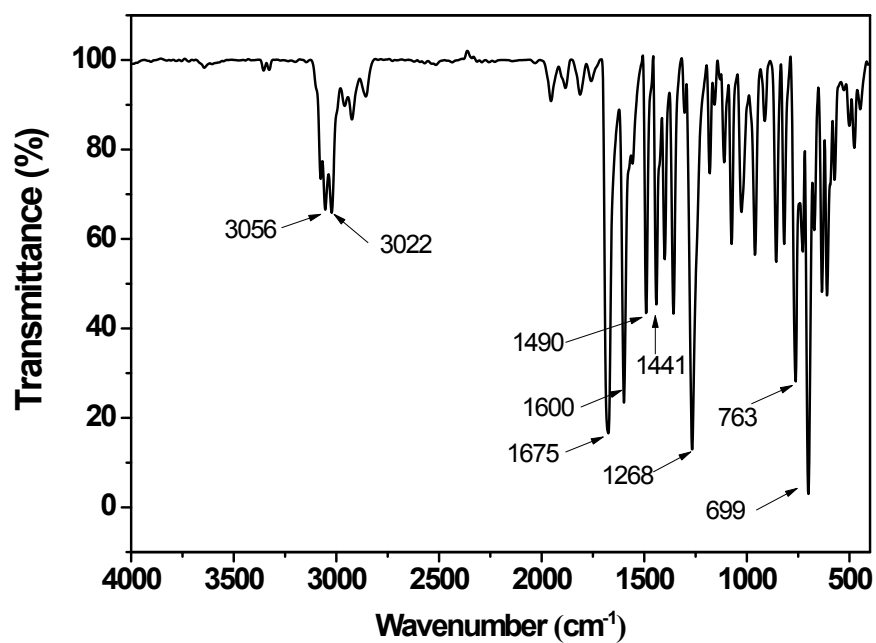

Fig. S16 FT-IR spectrum of *p*-P<sub>4</sub>Ac

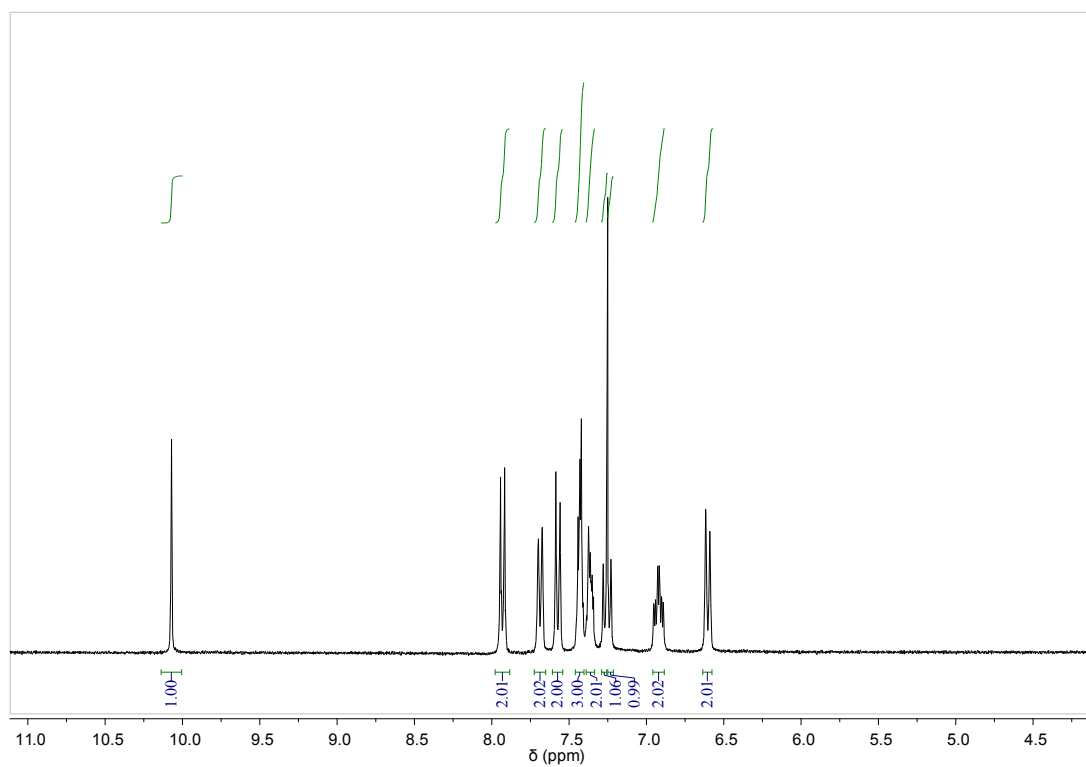

Fig. S17  $^1\text{H}$  NMR spectrum of *p*-FP<sub>2</sub>A in  $\text{CDCl}_3$

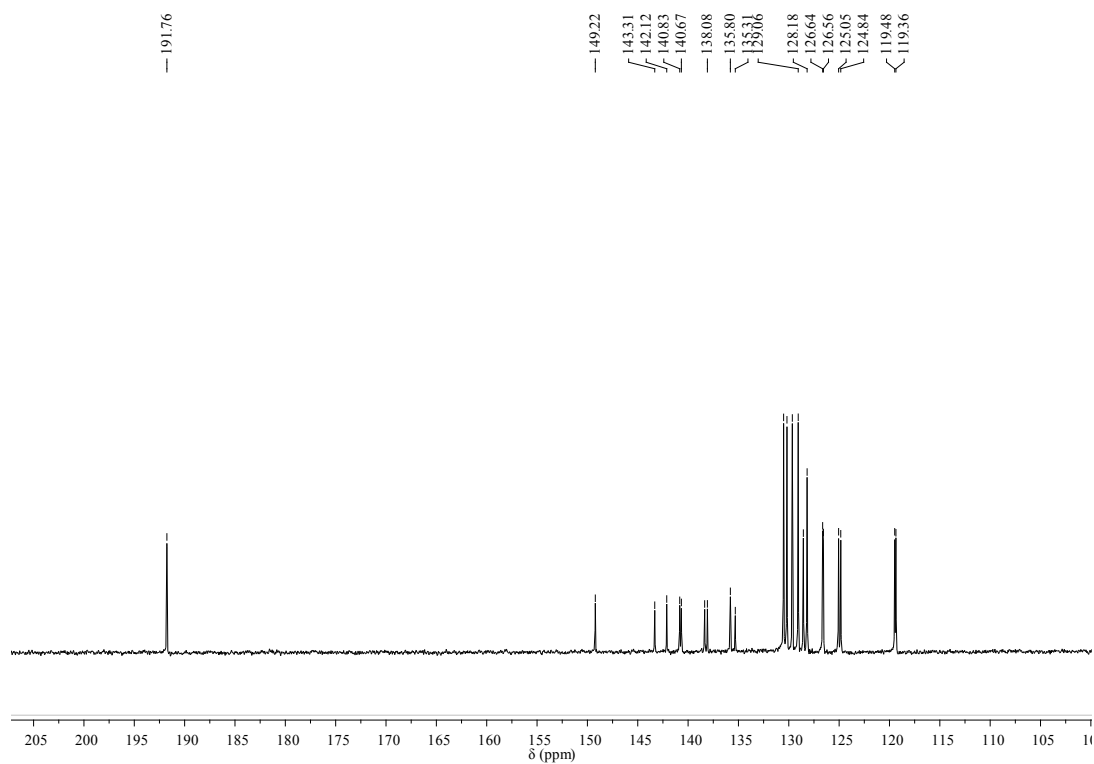

Fig. S18  $^{13}\text{C}$  NMR spectrum of *p*-FP<sub>2</sub>A in  $\text{CDCl}_3$

042804 #82 RT: 2.12 AV: 1 NL: 1.08E8  
T: + c Full ms [45.00-800.00]

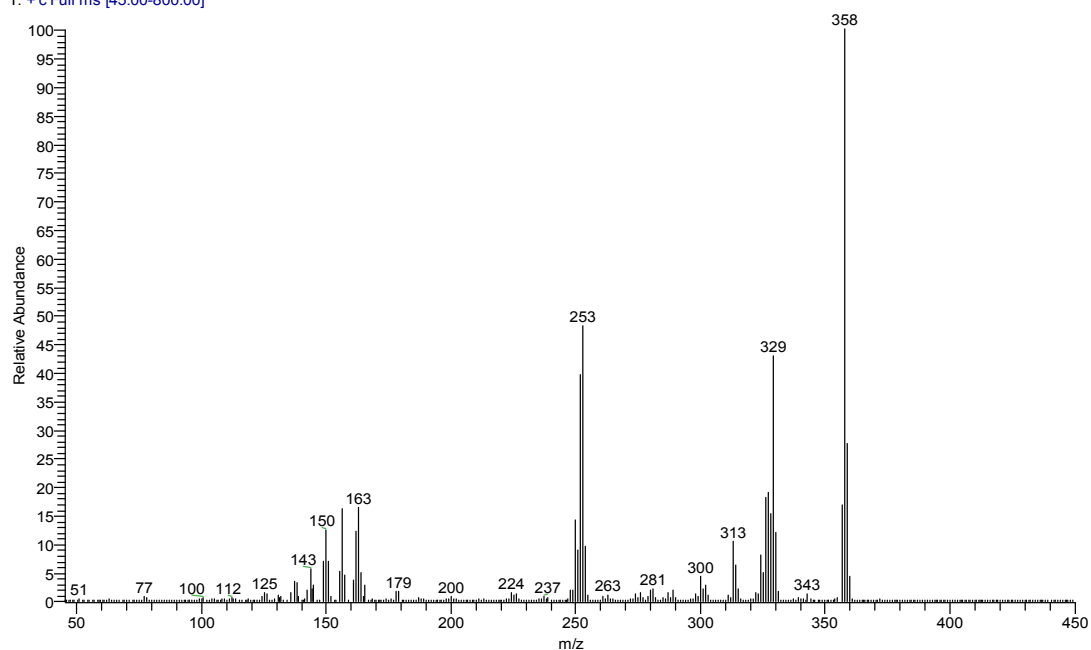

Fig. S19 EI-MS of *p*-FP<sub>2</sub>A

032404-fp2a-c1 #18 RT: 0.46 AV: 1 NL: 4.42E4  
T: + c EI Full ms [ 353.50-364.50]

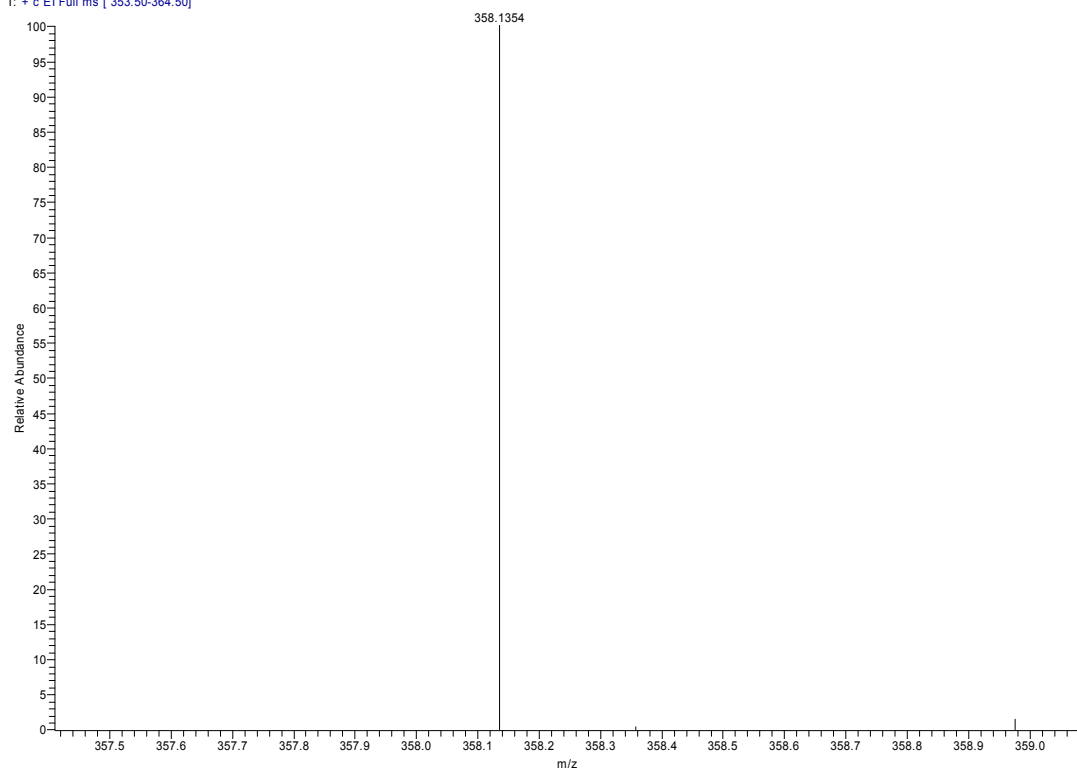

Fig. S20 HRMS of *p*-FP<sub>2</sub>A

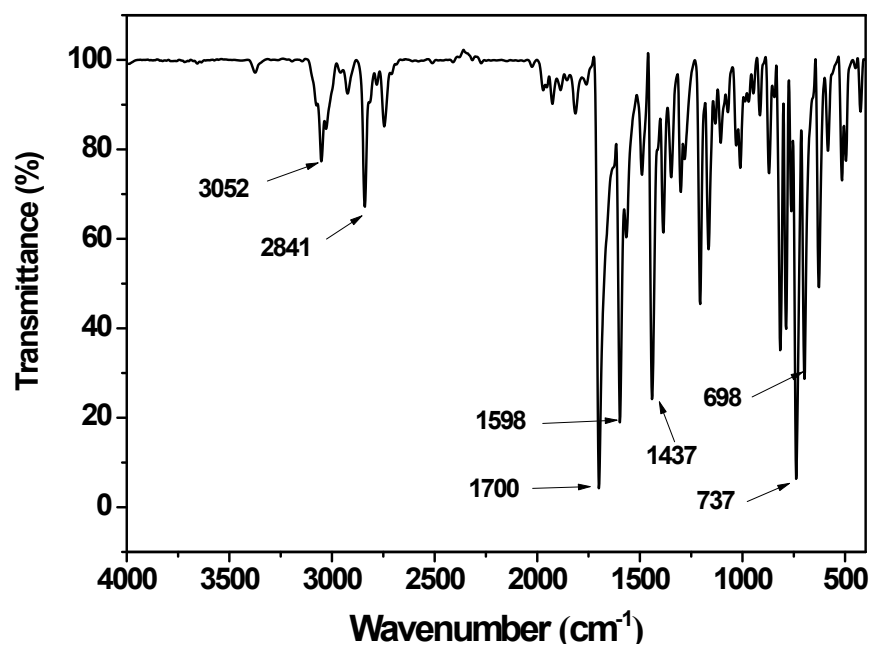

Fig. S21 FT-IR spectrum of *p*-FP<sub>2</sub>A

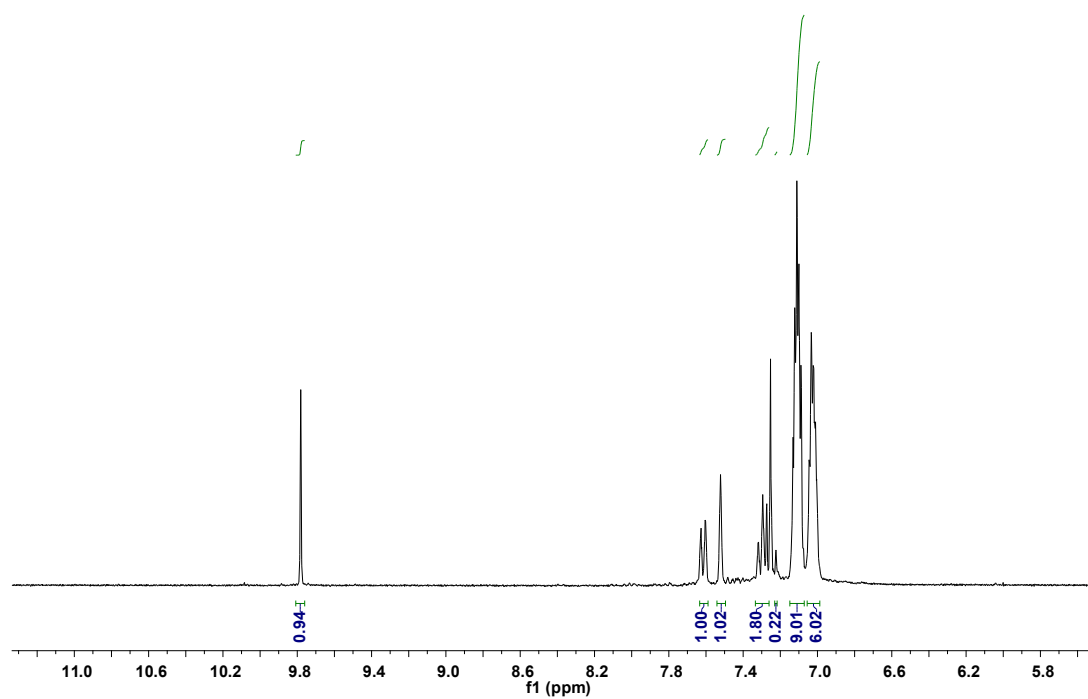

Fig. S22 <sup>1</sup>H NMR spectrum of *m*-P<sub>4</sub>A in CDCl<sub>3</sub>

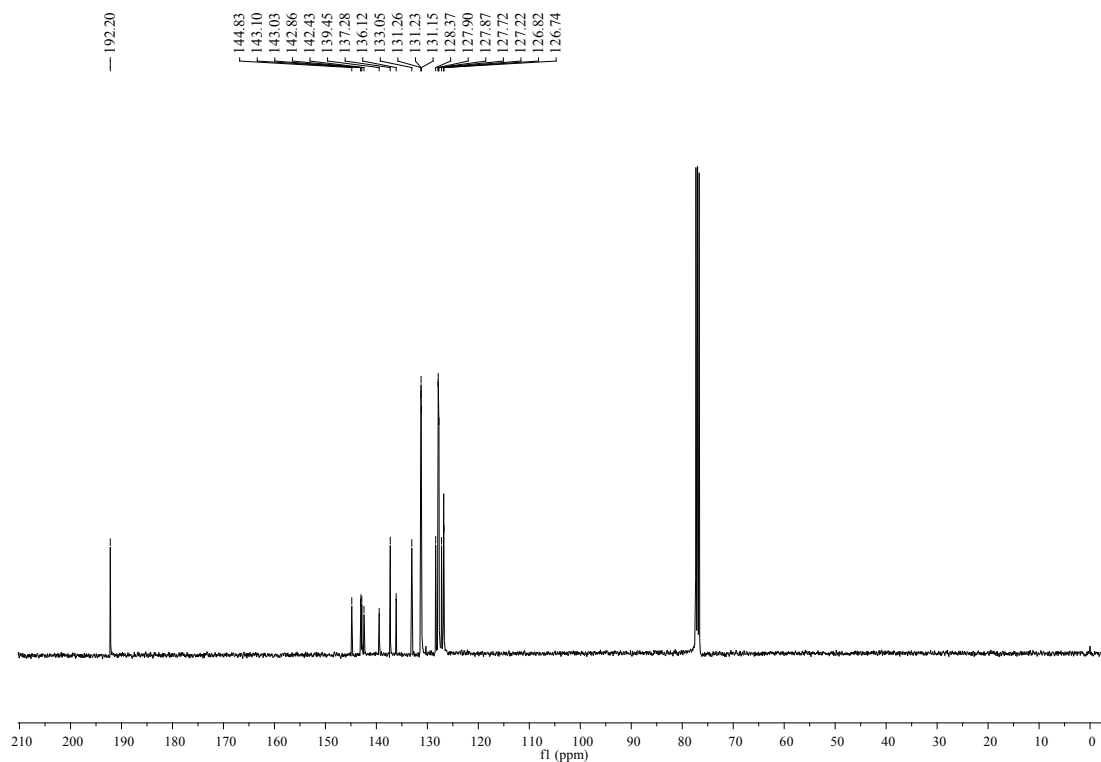

Fig. S23  $^{13}\text{C}$  NMR spectrum of *m*-P<sub>4</sub>A in CDCl<sub>3</sub>

Instrument:DSQ(Thermo)

Ionization Method:EI

D:\DSQ\DATA-LR\14042402

4/24/2014 5:32:52 PM

*m*-P<sub>4</sub>A

042402 #57 RT: 1.47 AV: 1 NL: 9.92E5

T: + c Full ms [45.00-800.00]

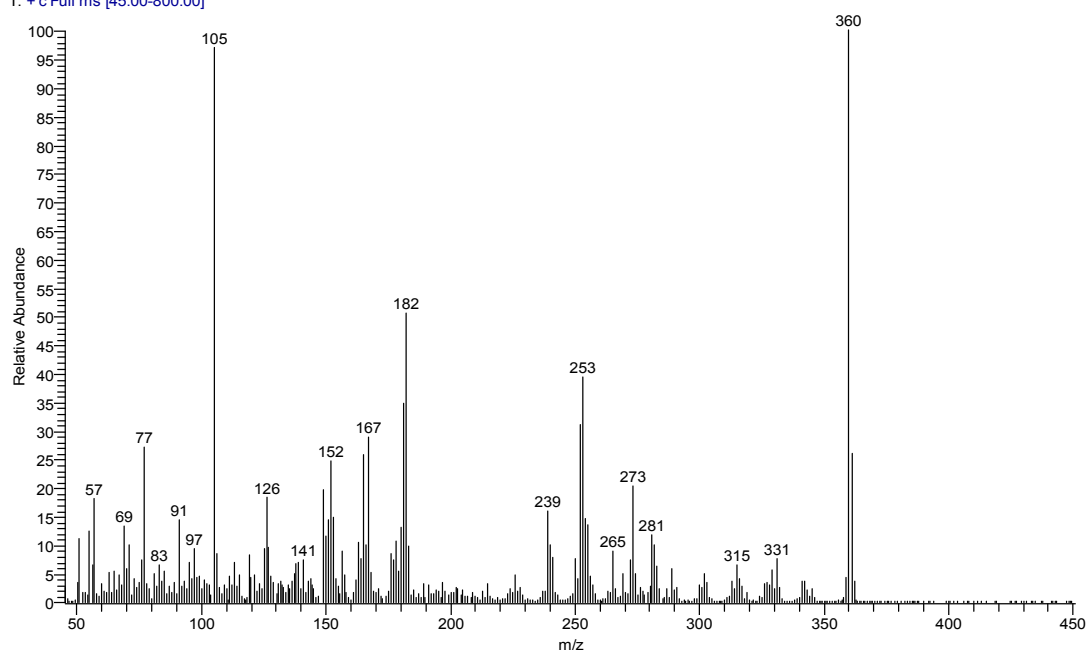

Fig. S24 EI-MS of *m*-P<sub>4</sub>A

032402-m-p4a-c1 #22 RT: 0.63 AV: 1 NL: 2.60E4  
T: + c EI Full ms [ 353.50-364.50]

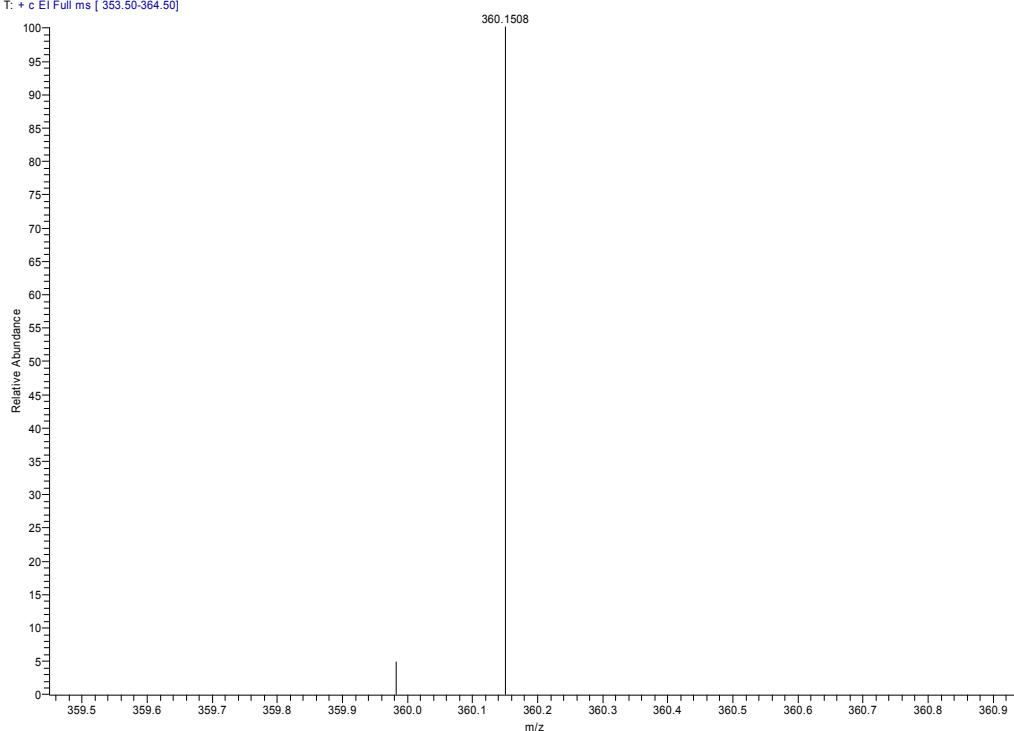

Fig. S25 HRMS of *m*-P<sub>4</sub>A

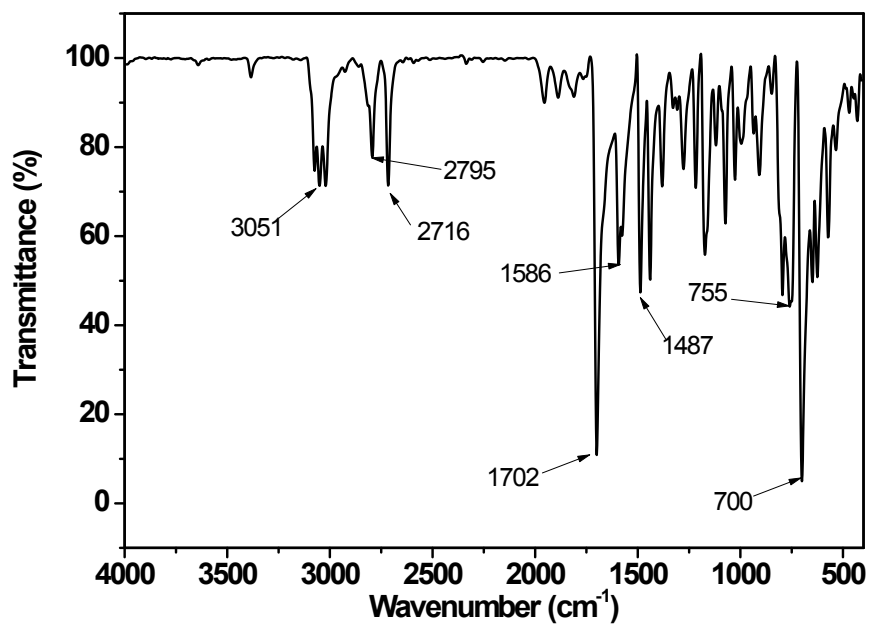

Fig. S26 FT-IR spectrum of *m*-P<sub>4</sub>A

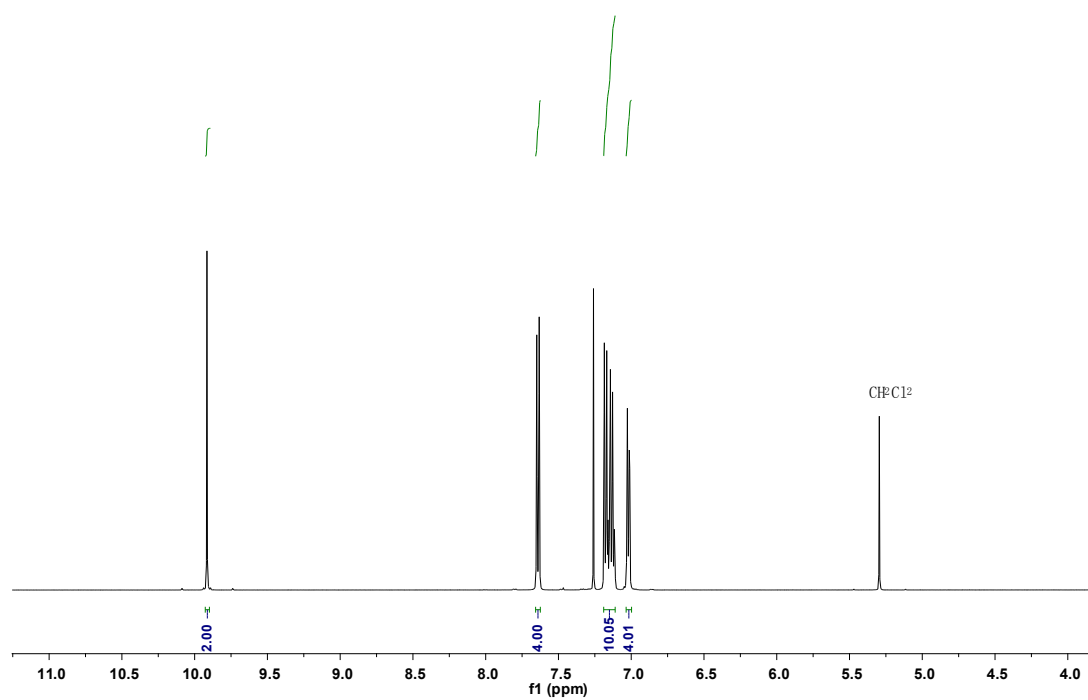

Fig. S27 <sup>1</sup>H NMR spectrum of *p*-P<sub>4</sub>A<sub>2</sub> in CDCl<sub>3</sub>

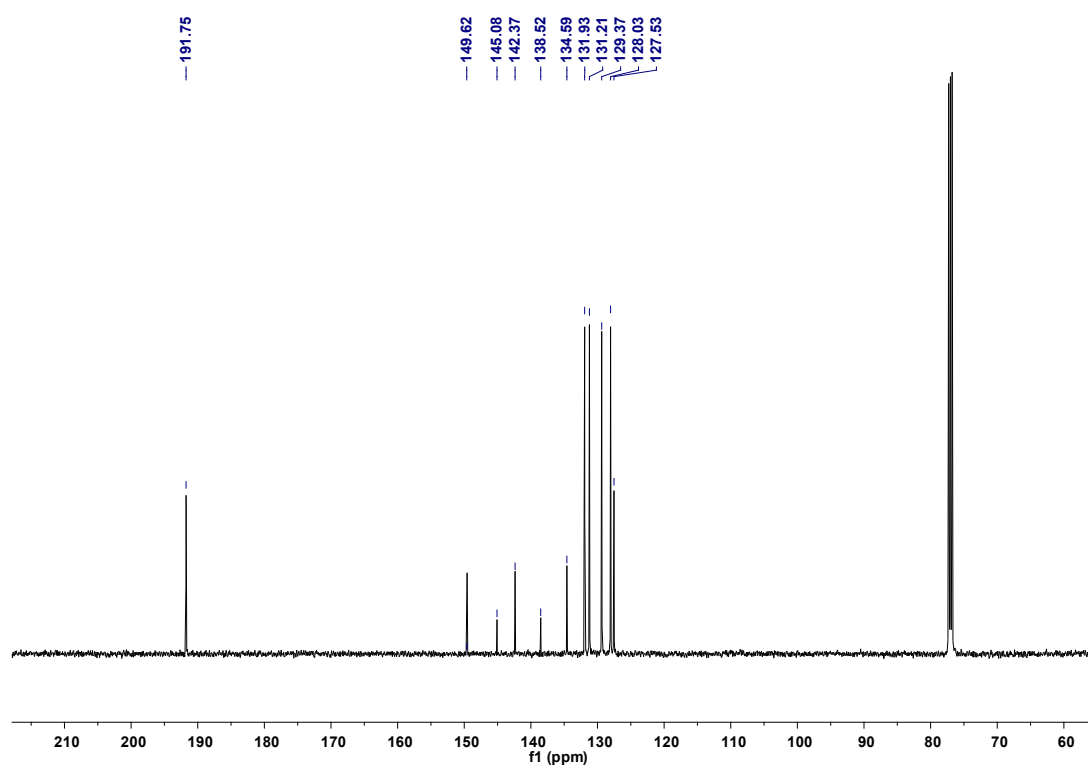

Fig. S28 <sup>13</sup>C NMR spectrum of *p*-P<sub>4</sub>A<sub>2</sub> in CDCl<sub>3</sub>

052302 #98 RT: 2.52 AV: 1 NL: 9.57E7  
T: + c Full ms [45.00-800.00]

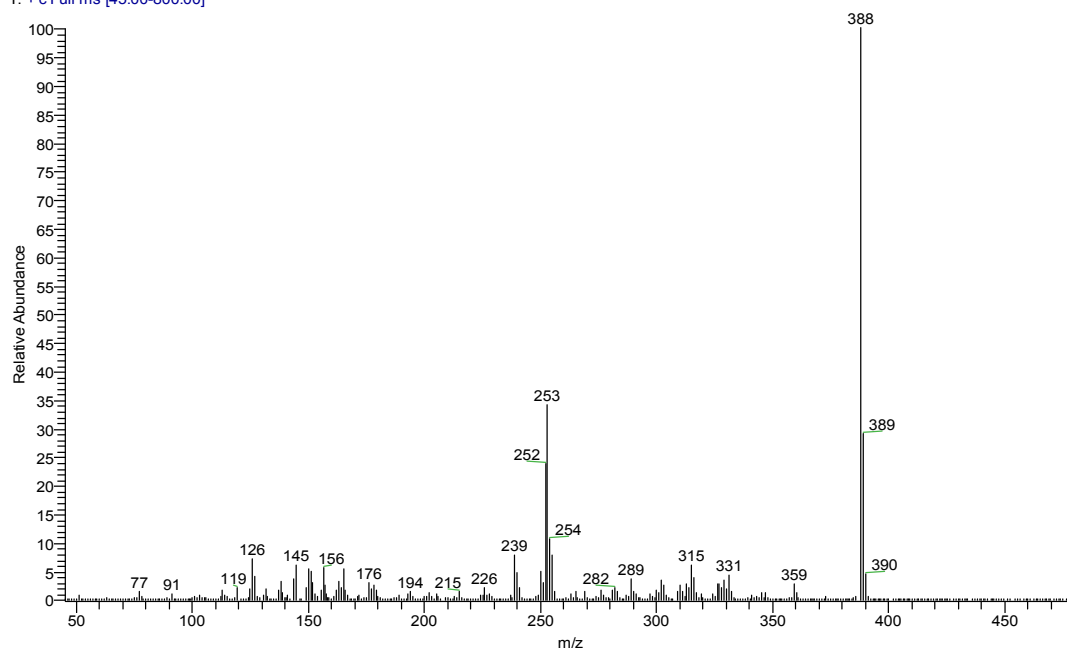

Fig. S29 EI-MS of  $p\text{-P}_4\text{A}_2$

Instrument: MAT 95XP (Thermo)  
D:\DATA-HR\15\032406-p4a2-c1

3/24/2015 4:51:02 PM

P4A2

032406-p4a2-c1 #15 RT: 0.37 AV: 1 NL: 9.81E4  
T: + c EI Full ms [ 379.50-393.70]

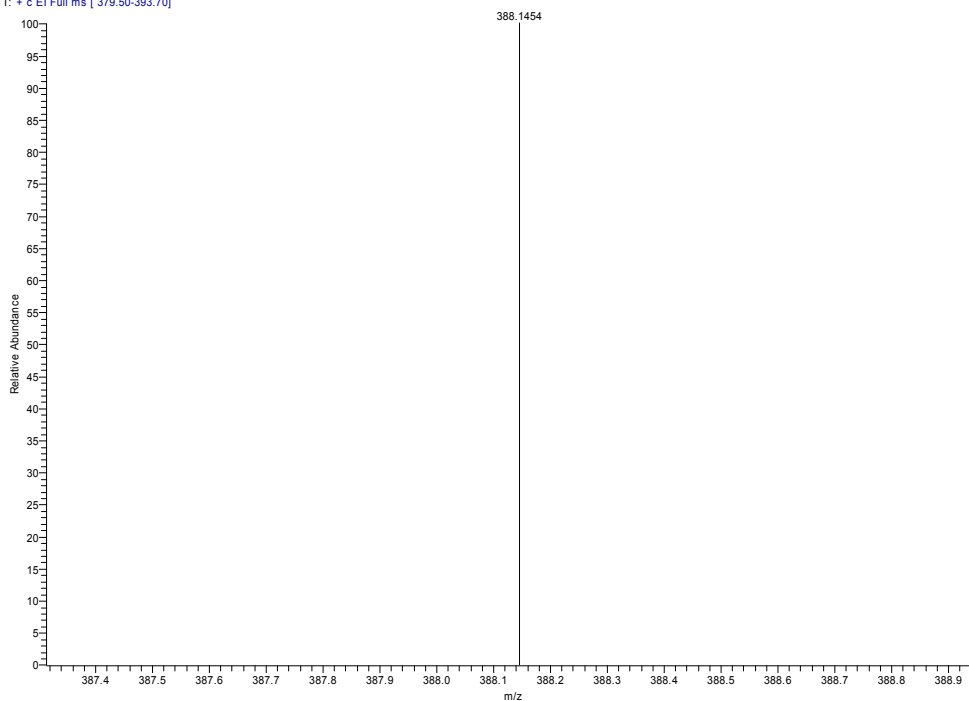

Fig. S30 HRMS of  $p\text{-P}_4\text{A}_2$

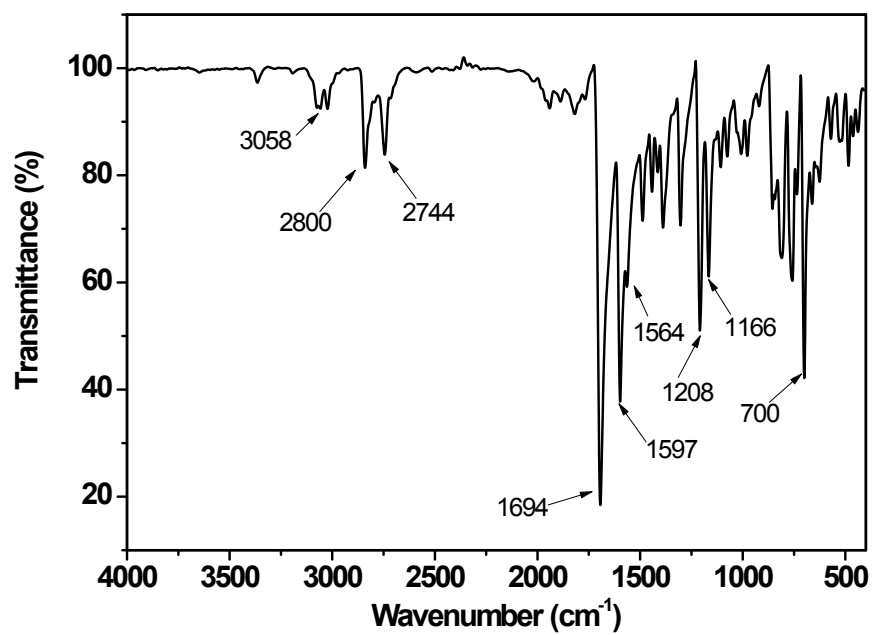

Fig. S31 FT-IR spectrum of *p*-P<sub>4</sub>A<sub>2</sub>
